# Supplementary material for: Rapid quantification of disaccharide isomers by derivatization in combination with ion mobility spectrometry in beer and milk
Source: Royal Society of Chemistry journal article supplement (doi:10.1039/d4an00995a), 2024-01-01
Supplement: d4an00995a1.pdf [file d4an00995a1.pdf]

## Supplementary information

### Instrument parameters

The analytical instrument used in this work was the TIMS-time-of-flight mass spectrometry (TIMS-TOF MS) from Bruker Daltonik (Bremen, Germany), which equipped with an electrospray ionization (ESI) source. All samples were analyzed by direct injection with a glass syringe of 500 mL from Hamilton (Giarmata, Romania). The sample solutions were directly injected into the ESI emitter through a syringe pump at a rate of 3  $\mu\text{L}/\text{min}$ . The parameters of the TIMS-TOF MS are set as follows: the end plate offset voltage was set at 500V, the capillary voltage was set at 4.5 kV, the range of  $1/K_0$  was set to 0.5-2.09  $\text{V}\cdot\text{s}\cdot\text{cm}^{-2}$ , the dry gas flow rate was set at 4  $\text{L}\cdot\text{min}^{-1}$  at 200  $^\circ\text{C}$ , and the nebulizer gas pressure was set at 0.3 bar; With these parameter settings, the mass and ion mobility was calibrated using the Agilent ESI Low Concentration Tuning Mix before the experiment.

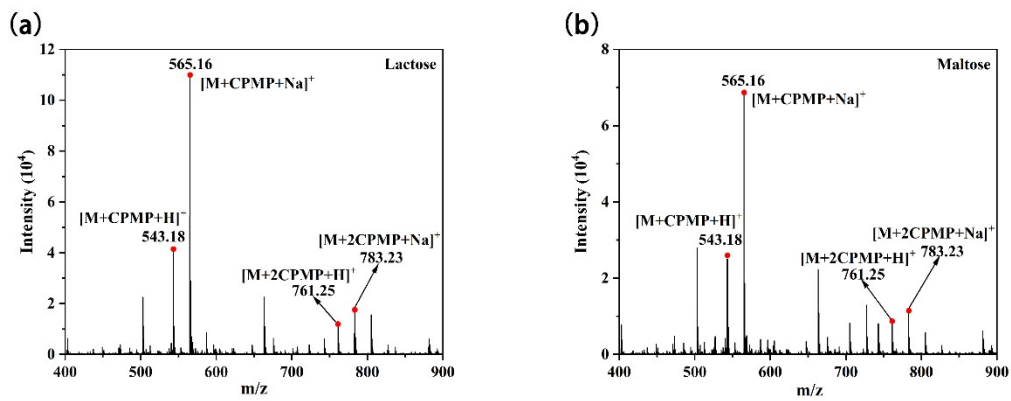

**Fig. S1** Positive ion mass spectra of CPMP labeled lactose (a) and maltose (b).

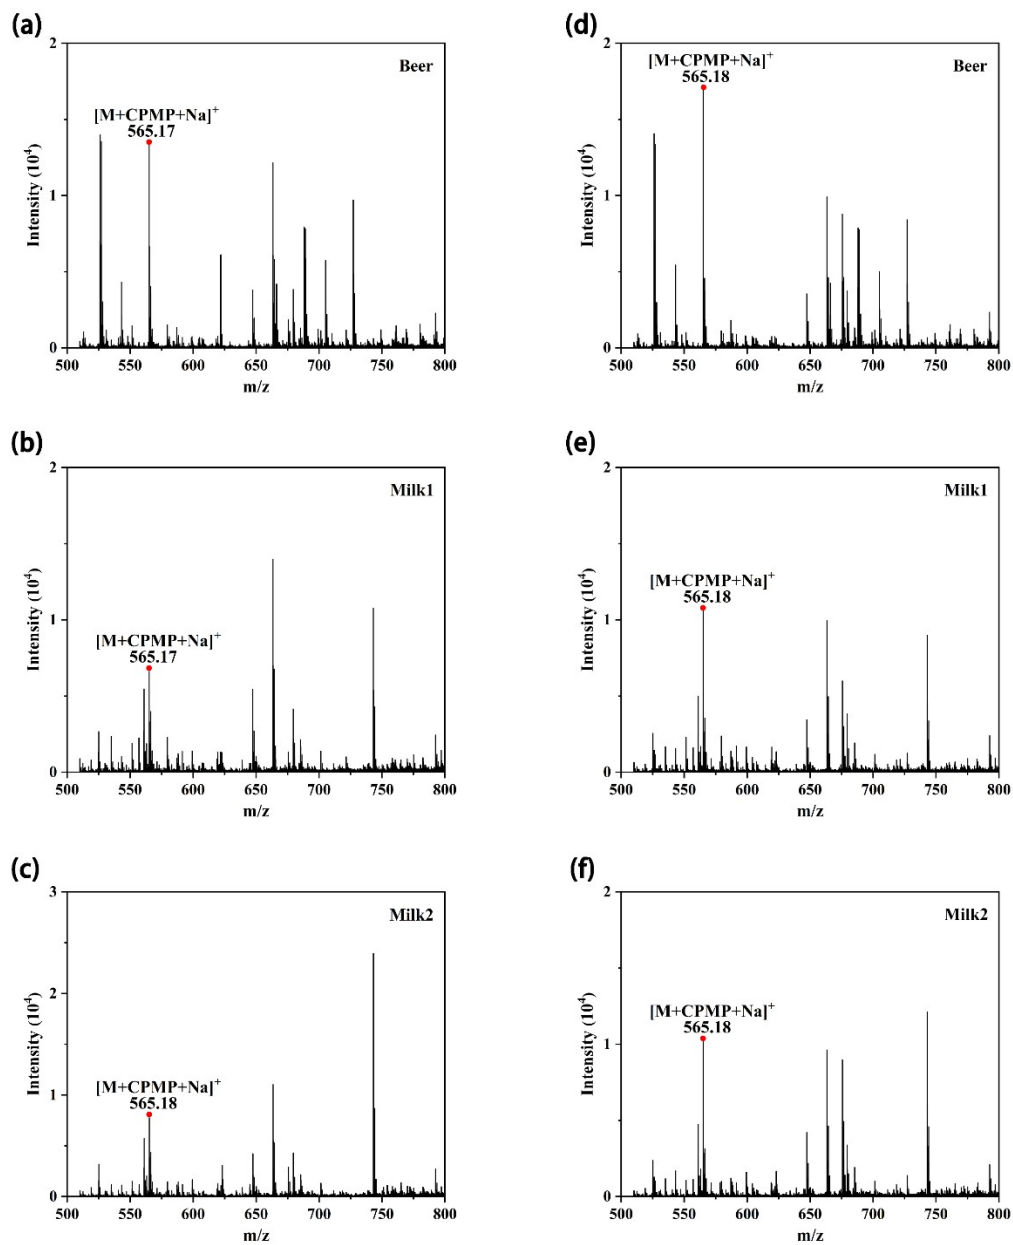

**Fig. S2** Mass spectra of beer and milk after derivatization. (a) (b) (c) unspiked and (d) (e) (f) spiked with lactose and maltose (1mg/mL).

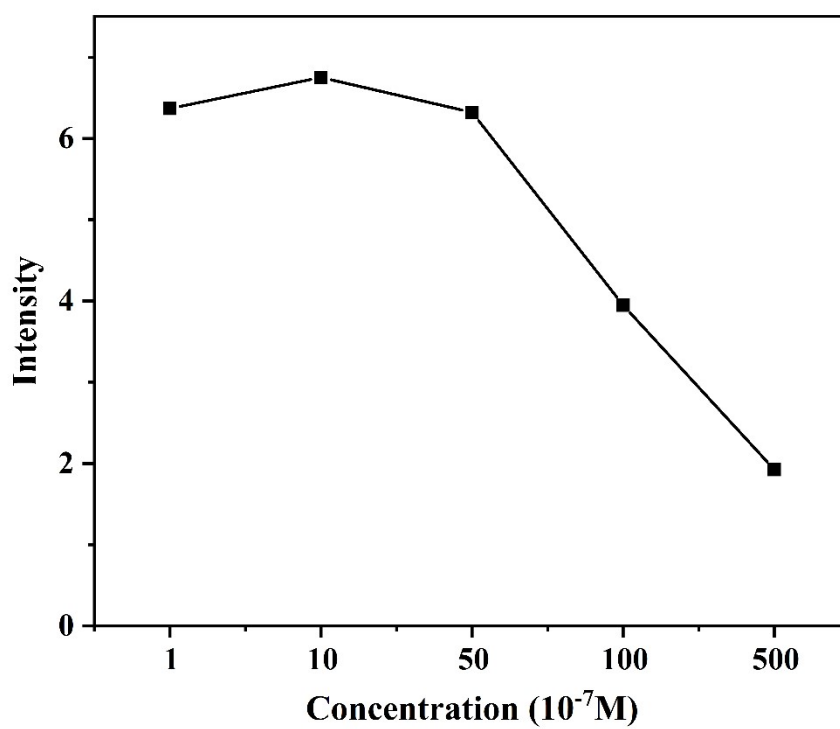

**Fig. S3** Signal intensity of  $[M + \text{CPMP} + \text{Na}]^+$  at different  $\text{Na}^+$  concentrations.

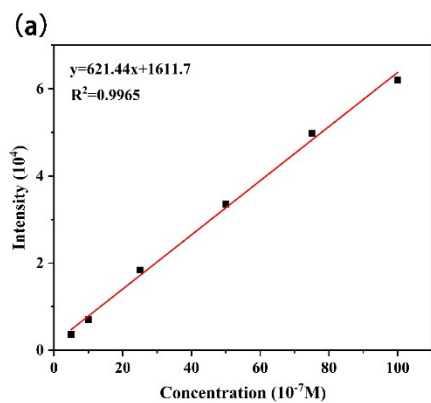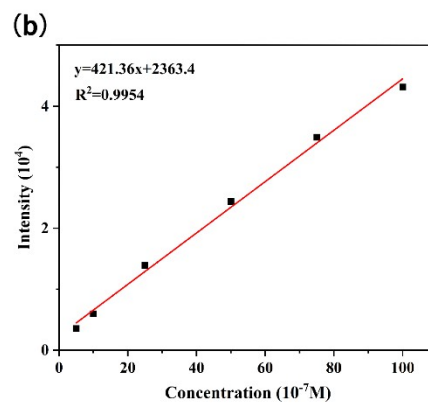

**Fig. S4** The linear curves for absolute quantification of lactose (a) and maltose (b).

**Table S1** Analytical results after derivatization of the isomers lactose and maltose.

| Ions                          | m/z    | 1/K <sub>0</sub> |         | W <sub>FWHM</sub> |         | CCS     |         | R <sub>P-P</sub> |
|-------------------------------|--------|------------------|---------|-------------------|---------|---------|---------|------------------|
|                               |        | Lactose          | Maltose | Lactose           | Maltose | Lactose | Maltose |                  |
| [M + Na] <sup>+</sup>         | 365.12 | 0.837            | 0.850   | 0.013             | 0.012   | 173.9   | 176.6   | 0.763            |
| [M + K] <sup>+</sup>          | 381.09 | 0.852            | 0.865   | 0.009             | 0.010   | 176.7   | 179.5   | 0.803            |
| [M + CPMP + H] <sup>+</sup>   | 543.18 | 1.102            | 1.117   | 0.011             | 0.011   | 226.2   | 229.4   | 0.801            |
| [M + CPMP + Na] <sup>+</sup>  | 565.16 | 1.116            | 1.137   | 0.012             | 0.012   | 229.0   | 233.2   | 1.028            |
| [M + 2CPMP + H] <sup>+</sup>  | 761.25 | 1.328            | 1.352   | 0.010             | 0.009   | 270.7   | 275.7   | 1.484            |
| [M + 2CPMP + Na] <sup>+</sup> | 783.23 | 1.352            | 1.342   | 0.010             | 0.011   | 275.6   | 273.4   | 0.559            |

**Table S2** Analysis of  $[M + \text{CPMP} + \text{Na}]^+$  after disaccharide derivatization.

| $[M + \text{CPMP} + \text{Na}]^+$ | $1/K_0$ (V·s/cm <sup>2</sup> ) | CCS (Å <sup>2</sup> ) |
|-----------------------------------|--------------------------------|-----------------------|
| Isomaltose                        | 1.128                          | 231.3                 |
| Melibiose                         | 1.130                          | 231.7                 |
| Cellobiose                        | 1.132                          | 232.1                 |
| Gentiobiose                       | 1.125                          | 230.7                 |

**Table S3** Analysis of  $[M + 2\text{CPMP} + \text{H}]^+$  after disaccharide derivatization.

| $[M + 2\text{CPMP} + \text{H}]^+$ | $1/K_0$ (V·s/cm <sup>2</sup> ) | CCS (Å <sup>2</sup> ) |
|-----------------------------------|--------------------------------|-----------------------|
| Isomaltose                        | 1.324                          | 269.9                 |
| Melibiose                         | 1.326                          | 270.4                 |
| Cellobiose                        | 1.332                          | 271.7                 |
| Gentiobiose                       | 1.325                          | 270.1                 |

**Table S4** Quantitative results of spiked lactose and maltose isomers in real samples.

| Real samples | Spiked (mol/L)          |                         | Detected (mol/L)        |                         | Recovery rate (%) |
|--------------|-------------------------|-------------------------|-------------------------|-------------------------|-------------------|
|              | Lactose                 | Maltose                 | Lactose                 | Maltose                 |                   |
| Beer         | $5.85 \times 10^{-7}$ M | /                       | $4.67 \times 10^{-7}$ M | /                       | 79.8              |
| Milk1        | /                       | $5.56 \times 10^{-7}$ M | /                       | $4.77 \times 10^{-7}$ M | 85.8              |
| Milk2        | /                       | $5.56 \times 10^{-7}$ M | /                       | $5.86 \times 10^{-7}$ M | 105.4             |



**Table S5 Comparison with previous methods used to identify and quantify disaccharides.**

| <b>Method</b> | <b>Sample pre-treatment</b> | <b>Analysis time (min)</b> | <b>Sensitivity</b> | <b>recovery rate (%)</b> | <b>Reference</b> |
|---------------|-----------------------------|----------------------------|--------------------|--------------------------|------------------|
| CZE           | Complex                     | 22                         | µg/L               | 94.0-102.5%              | 1                |
| HPLC-ELSD     | Complex                     | 50                         | mg/L               | 80.4-99.4%               | 2                |
| HPLC          | Complex                     | 16                         | mg/L               | 96.0-107.0%              | 3                |
| IMS           | Simple                      | 3                          | µg/L               | 79.8-105.4%              | This work        |

## Reference

1. T. Wang, X.B. Yang, D.Y. Wang, Y.D. Jiao, Y. Wang, Y. Zhao, Analysis of compositional carbohydrates in polysaccharides and foods by capillary zone electrophoresis, *Carbohydr. Polym.*, 2012, **88**, 754-762. DOI: 10.1016/j.carbpol.2012.01.039.
2. Y.Q. Zhang, W.H. Zhang, J.B. Hou, J.M. He, K. Li, Y. Li, D.M. Xu, Determination of sugars and sugar alcohols in infant formula by high performance liquid chromatography with evaporative light-scattering detector, *J. Chromatogr. B*, 2023, **1217**, 123621. DOI: 10.1016/j.jchromb.2023.123621.
3. E. Akyüz, K.S. Baskan, E. Tütem, R. Apak, High performance liquid chromatographic method with post-column detection for quantification of reducing sugars in foods, *J. Chromatogr. A*, 2021, **1660**, 462664. DOI: 10.1016/j.chroma.2021.462664.
